# Supplementary material for: 2-(5,6-Diphenyl-1,2, 4-Triazin-3-Yl)pyridinium Dichloroiodate (I)
Source: Preprints.org preprint supplement (doi:10.20944/preprints202305.1869.v1), 2023-05-26
Supplement: Supplementary file 2 [file supplementary]

## SUPPLEMENTARY MATERIALS

### **2-(5,6-Diphenyl-1,2,4-triazin-3-yl)pyridinium dichloroiodate (I)**

**M. Carla Aragoni<sup>1</sup>, Vito Lippolis<sup>1</sup>, Annalisa Mancini<sup>1</sup>, Anna Pintus<sup>1</sup>, Enrico Podda<sup>1,2\*</sup>, James B. Orton<sup>3</sup>, Simon J. Coles<sup>3</sup>, and Massimiliano Arca<sup>1\*</sup>**

<sup>1</sup> Dipartimento di Scienze Chimiche e Geologiche, Università degli Studi di Cagliari, S.S. 554 bivio Sestu, Monserrato, 09042 Cagliari, Italy

<sup>2</sup> Centro Servizi di Ateneo per la Ricerca (CeSAR), Università degli Studi di Cagliari, S.S. 554 bivio Sestu, Monserrato, 09042 Cagliari, Italy

<sup>3</sup> UK National Crystallography Service, School of Chemistry, Faculty of Engineering and Physical Sciences, University of Southampton, Southampton SO17 1BJ, UK

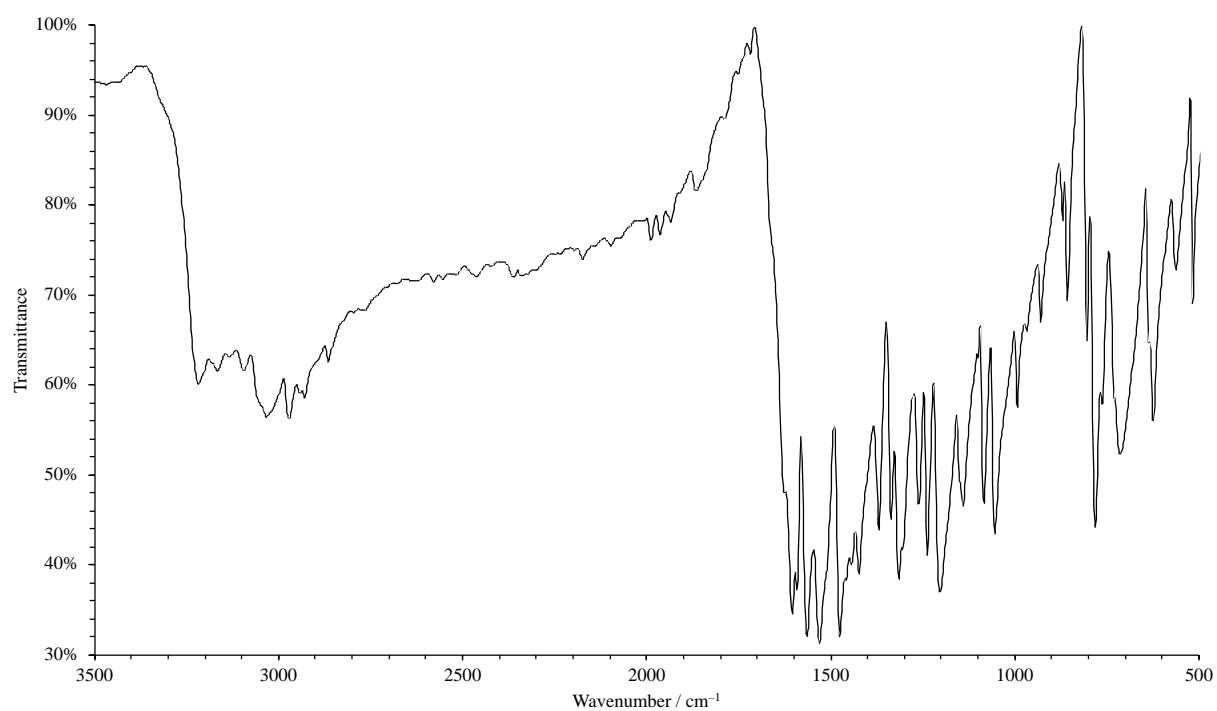

**Figure S1.** Solid state FT-MIR spectrum recorded for compound **1** (KBr pellet; 500–3500 cm<sup>-1</sup>).

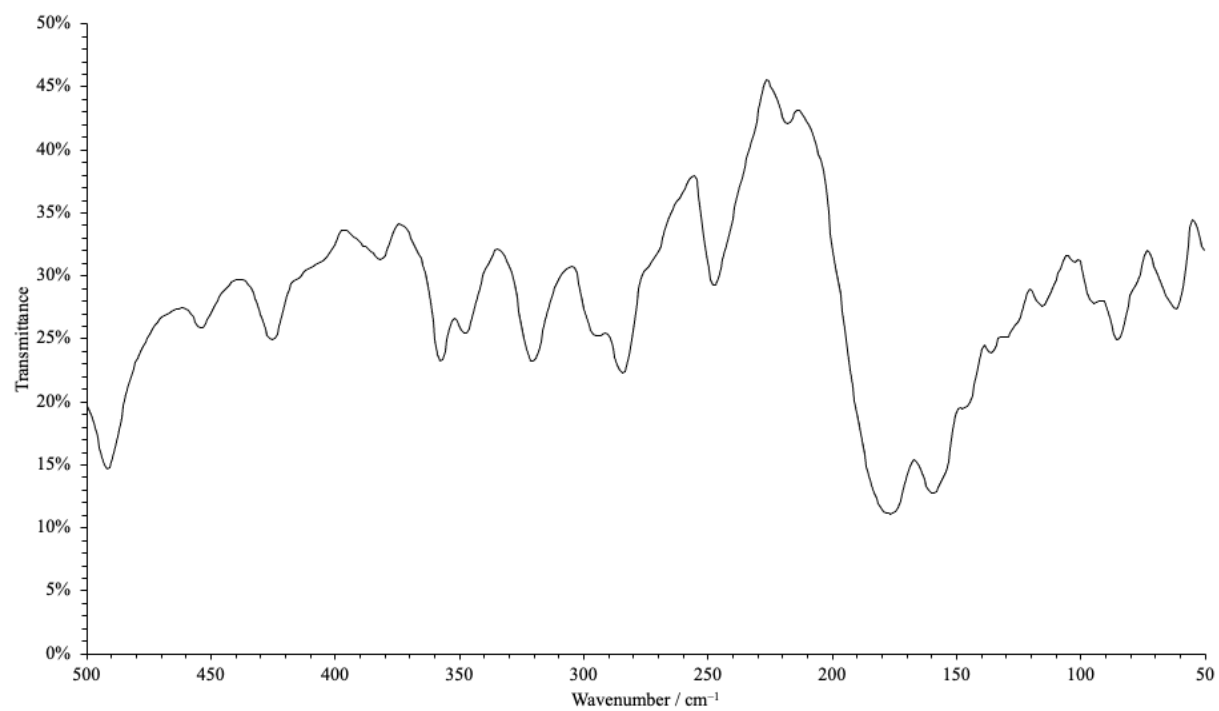

**Figure S2.** Solid state FT-FIR spectrum recorded for compound **1** (polythene pellet; 50–500 cm<sup>-1</sup>).

**Table S1** Crystal data and structure refinement parameters for compound **1**.

|                                                              |                                                                              |
|--------------------------------------------------------------|------------------------------------------------------------------------------|
| Empirical formula                                            | C <sub>20</sub> H <sub>15</sub> Cl <sub>2</sub> IN <sub>4</sub>              |
| Formula weight (g mol <sup>-1</sup> )                        | 509.16                                                                       |
| Temperature/K                                                | 120(2)                                                                       |
| Crystal system                                               | monoclinic                                                                   |
| Space group                                                  | <i>P</i> 2 <sub>1</sub> / <i>c</i>                                           |
| <i>a</i> /Å                                                  | 17.7427(13)                                                                  |
| <i>b</i> /Å                                                  | 7.4326(5)                                                                    |
| <i>c</i> /Å                                                  | 15.5351(12)                                                                  |
| $\alpha$ /°                                                  | 90                                                                           |
| $\beta$ /°                                                   | 100.659(7)                                                                   |
| $\gamma$ /°                                                  | 90                                                                           |
| Volume/Å <sup>3</sup>                                        | 2013.3(3)                                                                    |
| <i>Z</i>                                                     | 4                                                                            |
| $\rho_{\text{calc}}$ /cm <sup>3</sup>                        | 1.680                                                                        |
| $\mu$ /mm <sup>-1</sup>                                      | 1.868                                                                        |
| <i>F</i> (000)                                               | 1000.0                                                                       |
| Crystal size/mm <sup>3</sup>                                 | 0.4 × 0.16 × 0.03                                                            |
| Radiation                                                    | MoK $\alpha$ ( $\lambda$ = 0.71073)                                          |
| 2 $\Theta$ range for data collection/°                       | 5.958 to 55.072                                                              |
| Index ranges                                                 | -22 ≤ <i>h</i> ≤ 21, -9 ≤ <i>k</i> ≤ 9, -18 ≤ <i>l</i> ≤ 20                  |
| Reflections collected                                        | 19110                                                                        |
| Independent reflections                                      | 4624 [ <i>R</i> <sub>int</sub> = 0.0302, <i>R</i> <sub>sigma</sub> = 0.0297] |
| Data/restraints/parameters                                   | 4624/0/247                                                                   |
| Goodness-of-fit on <i>F</i> <sup>2</sup>                     | 1.072                                                                        |
| Final <i>R</i> indexes [ <i>I</i> ≥ 2 $\sigma$ ( <i>I</i> )] | <i>R</i> <sub>1</sub> = 0.0270, <i>wR</i> <sub>2</sub> = 0.0604              |
| Final <i>R</i> indexes [all data]                            | <i>R</i> <sub>1</sub> = 0.0335, <i>wR</i> <sub>2</sub> = 0.0634              |
| Largest diff. peak/hole / e Å <sup>-3</sup>                  | 0.64/-0.74                                                                   |

**Table S2** Bond lengths (Å) for compound **1**.

|         |          |         |           |
|---------|----------|---------|-----------|
| C1–C2   | 1.423(3) | C10–N4  | 1.341(3)  |
| C1–C4   | 1.475(3) | C11–C12 | 1.385(3)  |
| C1–N1   | 1.325(3) | C12–C13 | 1.384(4)  |
| C2–C15  | 1.479(3) | C13–C14 | 1.374(3)  |
| C2–N3   | 1.331(3) | C14–N4  | 1.333(3)  |
| C3–C10  | 1.473(3) | C15–C16 | 1.392(3)  |
| C3–N1   | 1.333(3) | C15–C20 | 1.392(3)  |
| C3–N2   | 1.329(3) | C16–C17 | 1.381(3)  |
| C4–C5   | 1.398(3) | C17–C18 | 1.384(4)  |
| C4–C9   | 1.391(3) | C18–C19 | 1.384(4)  |
| C5–C6   | 1.383(3) | C19–C20 | 1.380(3)  |
| C6–C7   | 1.381(3) | N2–N3   | 1.337(3)  |
| C7–C8   | 1.383(3) | Cl1–I1  | 2.4860(7) |
| C8–C9   | 1.385(3) | Cl2–I1  | 2.6003(6) |
| C10–C11 | 1.379(3) |         |           |

**Table S3** Bond angles (°) for compound **1**.

|            |            |             |            |
|------------|------------|-------------|------------|
| C2–C1–C4   | 125.47(19) | N4–C10–C11  | 119.0(2)   |
| N1–C1–C2   | 118.93(19) | C10–C11–C12 | 119.1(2)   |
| N1–C1–C4   | 115.60(18) | C13–C12–C11 | 120.1(2)   |
| C1–C2–C15  | 123.71(19) | C14–C13–C12 | 118.8(2)   |
| N3–C2–C1   | 120.6(2)   | N4–C14–C13  | 119.8(2)   |
| N3–C2–C15  | 115.72(18) | C16–C15–C2  | 120.5(2)   |
| N1–C3–C10  | 116.85(19) | C16–C15–C20 | 119.2(2)   |
| N2–C3–C10  | 116.57(19) | C20–C15–C2  | 120.31(19) |
| N2–C3–N1   | 126.6(2)   | C17–C16–C15 | 120.2(2)   |
| C5–C4–C1   | 122.19(19) | C16–C17–C18 | 120.2(2)   |
| C9–C4–C1   | 118.2(2)   | C19–C18–C17 | 120.1(2)   |
| C9–C4–C5   | 119.6(2)   | C20–C19–C18 | 119.9(2)   |
| C6–C5–C4   | 119.4(2)   | C19–C20–C15 | 120.5(2)   |
| C7–C6–C5   | 120.7(2)   | C1–N1–C3    | 116.46(19) |
| C6–C7–C8   | 120.2(2)   | C3–N2–N3    | 117.45(18) |
| C7–C8–C9   | 119.7(2)   | C2–N3–N2    | 119.67(18) |
| C8–C9–C4   | 120.4(2)   | C14–N4–C10  | 123.2(2)   |
| C11–C10–C3 | 123.4(2)   | Cl1–I1–Cl2  | 178.27(2)  |
| N4–C10–C3  | 117.55(19) |             |            |

**Table S4.** Optimized geometry calculated at DFT level (mPW1PW functional; def2-SVP basis set) for **L** in orthogonal Cartesian coordinate format.

| Center<br>Number | Atomic<br>Number | Coordinates (Angstroms) |           |           |
|------------------|------------------|-------------------------|-----------|-----------|
|                  |                  | X                       | Y         | Z         |
| 1                | 6                | -0.718583               | -0.966005 | -0.104529 |
| 2                | 6                | 1.859275                | -0.442680 | -0.042828 |
| 3                | 6                | -0.263370               | 0.383559  | -0.104321 |
| 4                | 6                | -1.113009               | 1.583976  | -0.275955 |
| 5                | 6                | -2.282716               | 1.566541  | -1.049229 |
| 6                | 6                | -0.686744               | 2.794565  | 0.289730  |
| 7                | 6                | -3.018316               | 2.732795  | -1.235042 |
| 8                | 1                | -2.611602               | 0.641085  | -1.522427 |
| 9                | 6                | -1.434247               | 3.954442  | 0.115034  |
| 10               | 1                | 0.244452                | 2.804424  | 0.856970  |
| 11               | 6                | -2.602721               | 3.926595  | -0.645765 |
| 12               | 1                | -3.920875               | 2.709598  | -1.847898 |
| 13               | 1                | -1.099021               | 4.888275  | 0.569554  |
| 14               | 1                | -3.186417               | 4.838038  | -0.787066 |
| 15               | 6                | -2.110138               | -1.418678 | 0.108221  |
| 16               | 6                | -2.578999               | -2.555266 | -0.565704 |
| 17               | 6                | -2.950776               | -0.780662 | 1.031589  |
| 18               | 6                | -3.869862               | -3.024182 | -0.342206 |
| 19               | 1                | -1.912253               | -3.064144 | -1.261862 |
| 20               | 6                | -4.237205               | -1.259088 | 1.260203  |
| 21               | 1                | -2.591506               | 0.088542  | 1.584180  |
| 22               | 6                | -4.703547               | -2.377045 | 0.569165  |
| 23               | 1                | -4.226407               | -3.903955 | -0.880759 |
| 24               | 1                | -4.878152               | -0.757797 | 1.987380  |
| 25               | 1                | -5.714811               | -2.747481 | 0.746246  |
| 26               | 6                | 3.316865                | -0.233231 | 0.161829  |
| 27               | 6                | 4.207540                | -1.301618 | -0.008099 |
| 28               | 6                | 5.009050                | 1.199341  | 0.703765  |
| 29               | 6                | 5.563951                | -1.069277 | 0.187752  |
| 30               | 1                | 3.818579                | -2.279614 | -0.287593 |
| 31               | 6                | 5.980555                | 0.208265  | 0.551540  |
| 32               | 1                | 5.300468                | 2.214194  | 0.994756  |
| 33               | 1                | 6.286573                | -1.877212 | 0.059585  |
| 34               | 1                | 7.034085                | 0.437323  | 0.717604  |
| 35               | 7                | 0.176899                | -1.938564 | -0.295788 |
| 36               | 7                | 1.455704                | -1.689418 | -0.317524 |
| 37               | 7                | 1.039180                | 0.598983  | 0.008366  |
| 38               | 7                | 3.713680                | 0.990316  | 0.513831  |

**Table S5.** Optimized geometry calculated at DFT level (mPW1PW functional; def2-SVP basis set) for HL<sup>+</sup> in orthogonal Cartesian coordinate format.

| Center<br>Number | Atomic<br>Number | Coordinates (Angstroms) |           |           |
|------------------|------------------|-------------------------|-----------|-----------|
|                  |                  | X                       | Y         | Z         |
| 1                | 6                | -0.042665               | 0.044362  | -0.011807 |
| 2                | 6                | -0.121419               | 0.061104  | 2.595831  |
| 3                | 6                | 1.186022                | 0.064952  | 0.736926  |
| 4                | 6                | 2.535660                | -0.055626 | 0.159904  |
| 5                | 6                | 2.790576                | -0.944802 | -0.895883 |
| 6                | 6                | 3.597386                | 0.670231  | 0.720333  |
| 7                | 6                | 4.085572                | -1.101628 | -1.376595 |
| 8                | 1                | 1.978450                | -1.528942 | -1.329962 |
| 9                | 6                | 4.886230                | 0.527904  | 0.218313  |
| 10               | 1                | 3.399945                | 1.364614  | 1.537926  |
| 11               | 6                | 5.132702                | -0.360686 | -0.828214 |
| 12               | 1                | 4.279145                | -1.806487 | -2.186138 |
| 13               | 1                | 5.703326                | 1.112181  | 0.643747  |
| 14               | 1                | 6.145127                | -0.476976 | -1.217953 |
| 15               | 6                | -0.159536               | 0.243655  | -1.463377 |
| 16               | 6                | -1.209323               | -0.383317 | -2.156164 |
| 17               | 6                | 0.699252                | 1.112912  | -2.157688 |
| 18               | 6                | -1.373580               | -0.170088 | -3.519336 |
| 19               | 1                | -1.887284               | -1.039465 | -1.610934 |
| 20               | 6                | 0.515428                | 1.337730  | -3.516460 |
| 21               | 1                | 1.499143                | 1.634834  | -1.632110 |
| 22               | 6                | -0.513101               | 0.689923  | -4.201928 |
| 23               | 1                | -2.181140               | -0.673455 | -4.052495 |
| 24               | 1                | 1.176400                | 2.026198  | -4.044501 |
| 25               | 1                | -0.647656               | 0.861499  | -5.271064 |
| 26               | 6                | -0.201527               | 0.155391  | 4.059451  |
| 27               | 6                | -1.375176               | 0.100645  | 4.806030  |
| 28               | 6                | 1.090005                | 0.396656  | 6.034136  |
| 29               | 6                | -1.291363               | 0.198296  | 6.190612  |
| 30               | 1                | -2.319684               | -0.018061 | 4.276214  |
| 31               | 6                | -0.047469               | 0.350019  | 6.816416  |
| 32               | 1                | 2.096875                | 0.507680  | 6.436340  |
| 33               | 1                | -2.200505               | 0.157276  | 6.792779  |
| 34               | 1                | 0.038657                | 0.429054  | 7.899482  |
| 35               | 7                | -1.198631               | -0.144211 | 0.636081  |
| 36               | 7                | -1.247176               | -0.177164 | 1.939629  |
| 37               | 7                | 1.091738                | 0.154721  | 2.058111  |
| 38               | 7                | 0.973780                | 0.298327  | 4.701178  |
| 39               | 1                | 1.789269                | 0.318183  | 4.075001  |
